# Supplementary material
Source: Springer Nature journal article supplement (https://www.springermedizin.de/resource/supplementary/12875_2012_845_MOESM3_ESM.pdf/9435648)

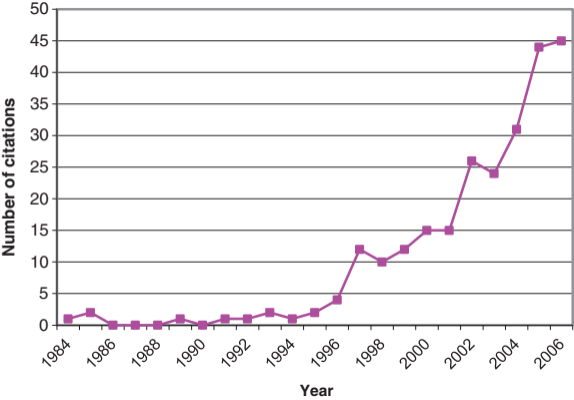

Supplement: MOESM3 [file 9435648]
